# Supplementary material
Source: PubMed Central journal article supplement (PMC6450769)

Supplementary Figure 1:

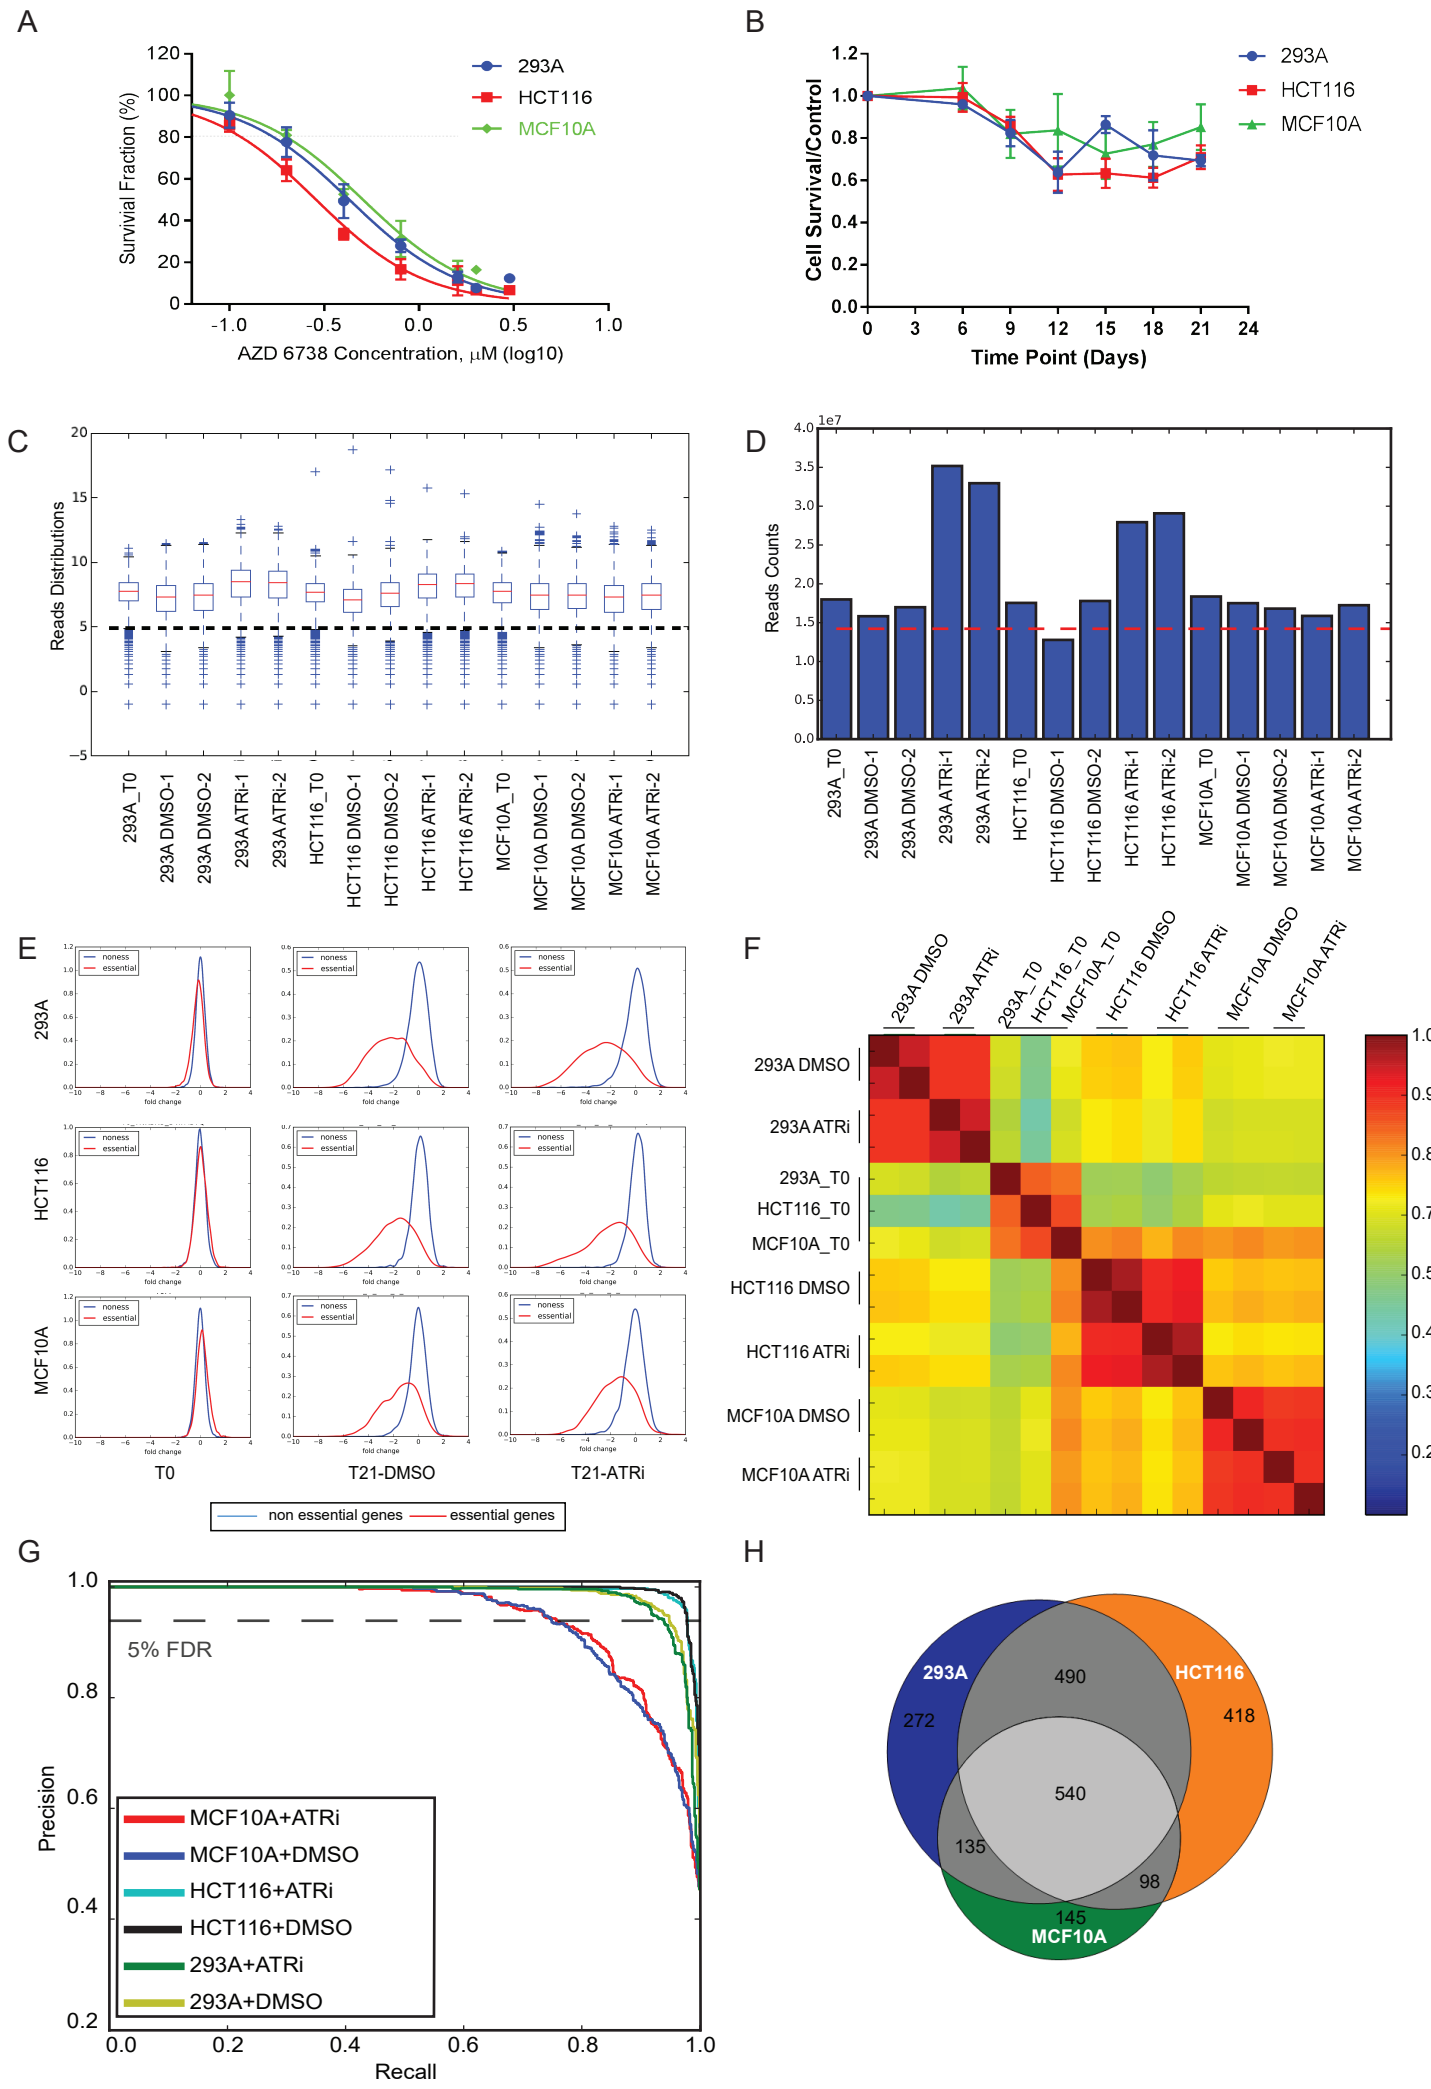

Supplement: NIHMS1512893-supplement-Supplementary_Figure_1.pdf [file NIHMS1512893-supplement-Supplementary_Figure_1.pdf]

# Supplementary Figure 2

A

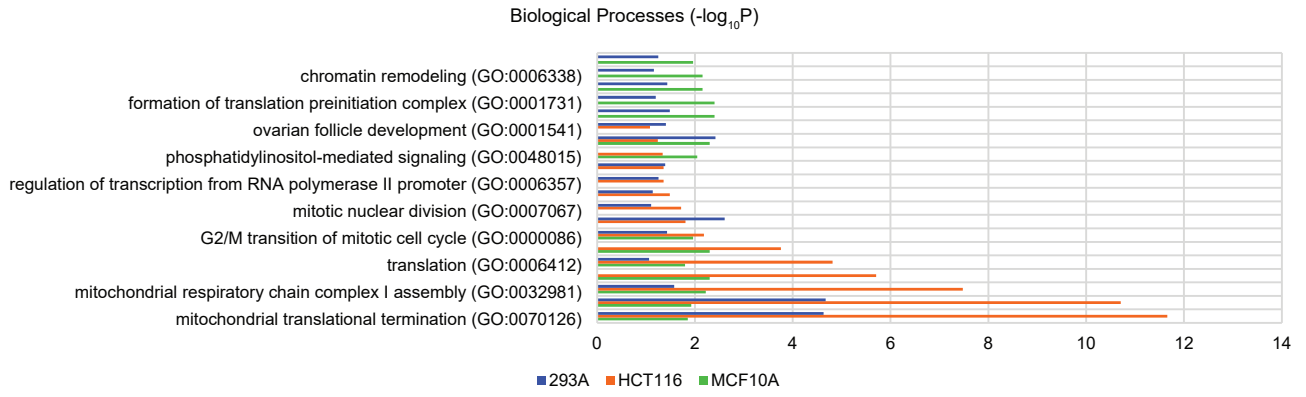

B

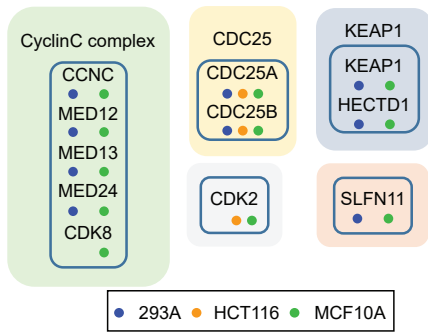

C

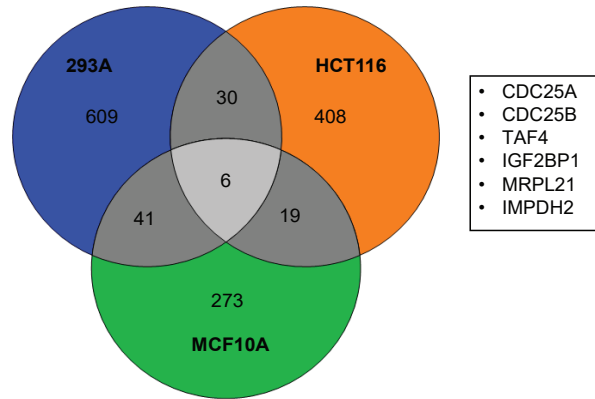

Supplement: NIHMS1512893-supplement-Supplementary_Figure_2.pdf [file NIHMS1512893-supplement-Supplementary_Figure_2.pdf]

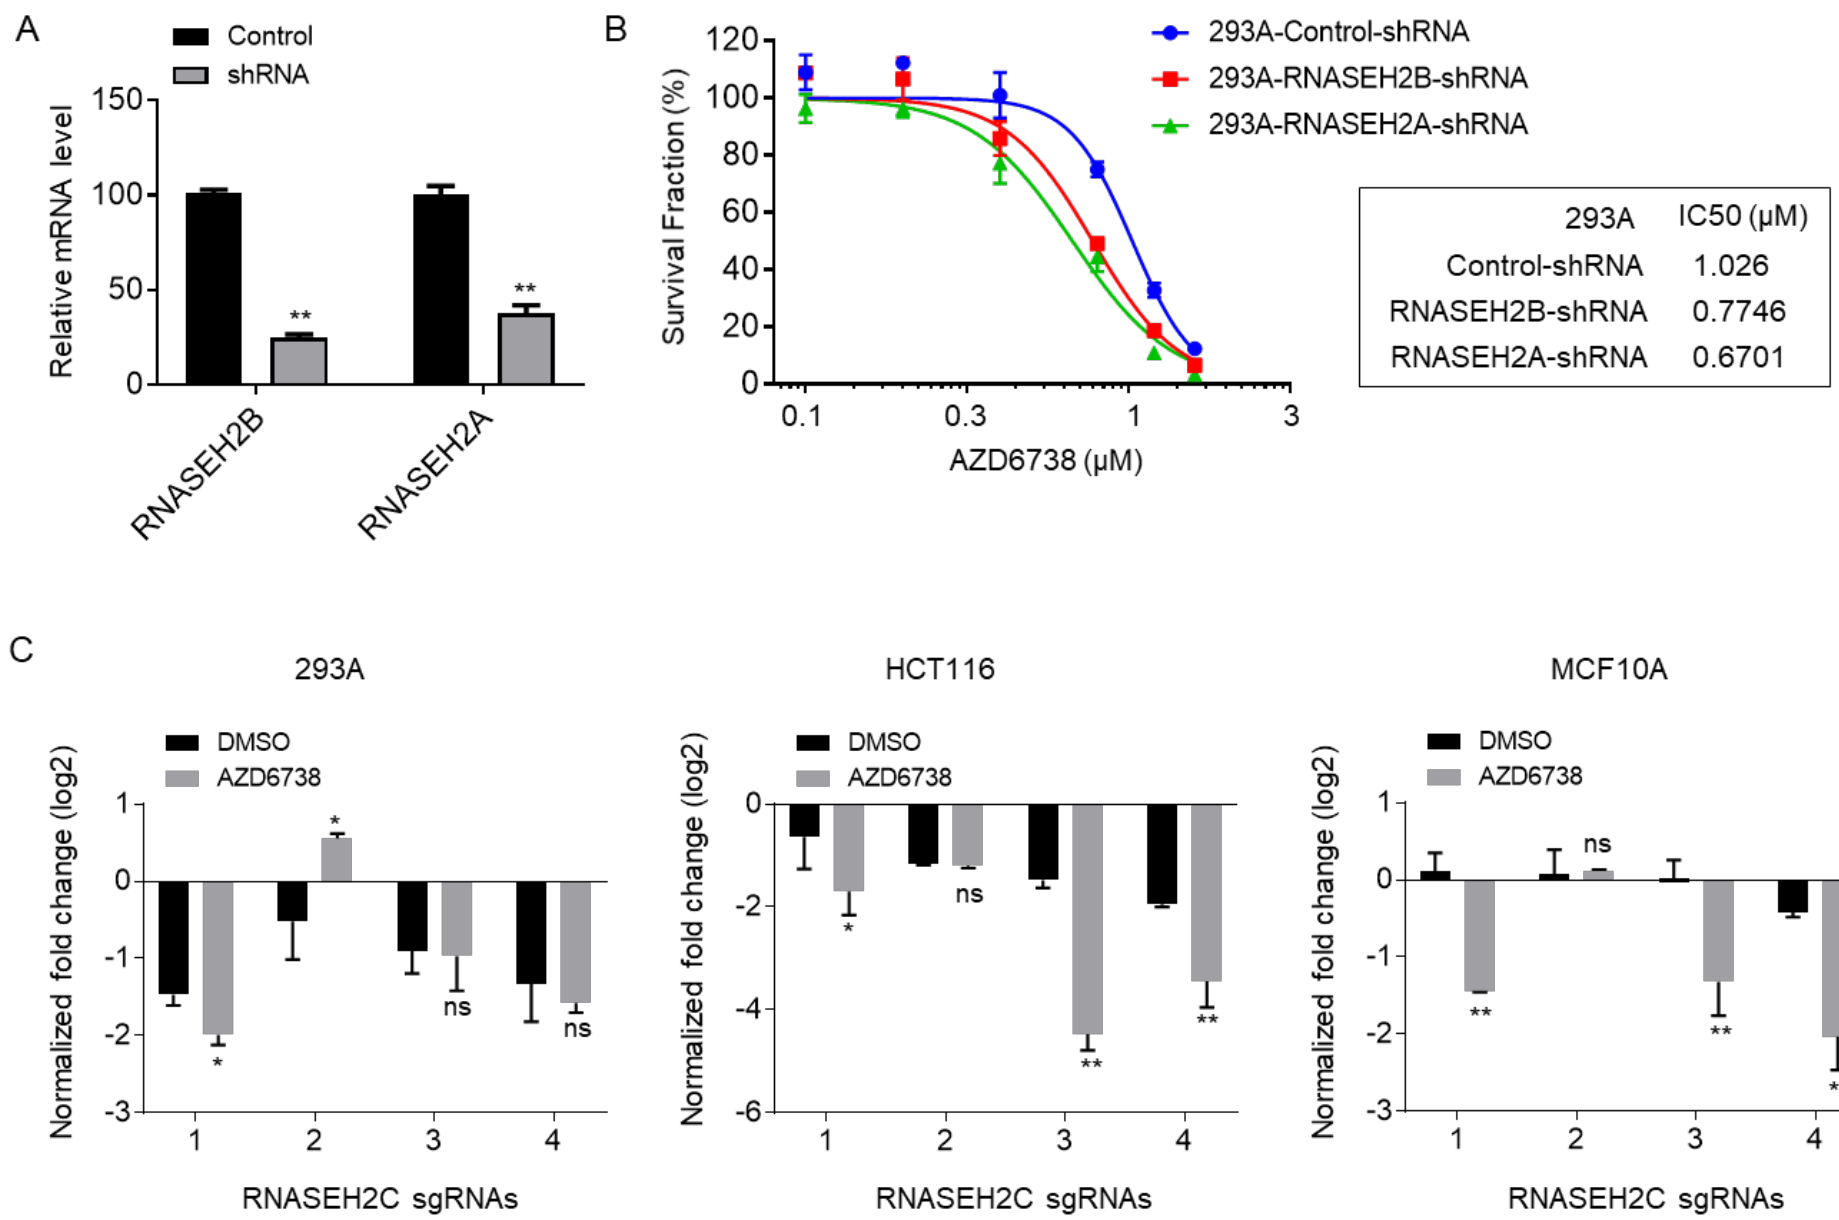

Supplement: NIHMS1512893-supplement-Supplementary_Figure_3.pdf [file NIHMS1512893-supplement-Supplementary_Figure_3.pdf]

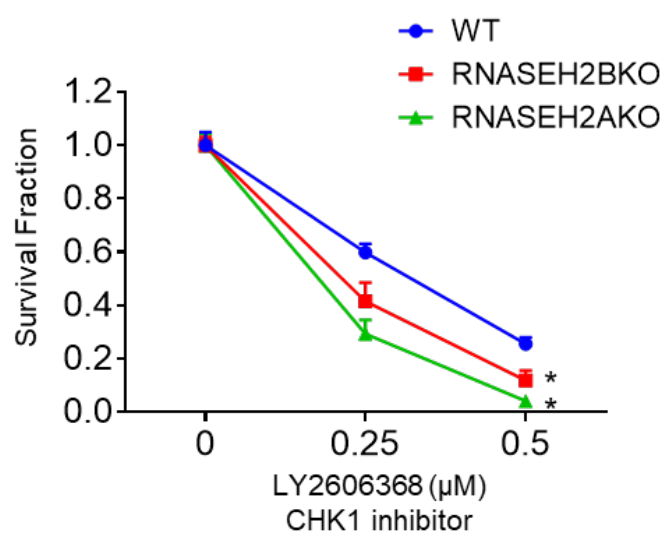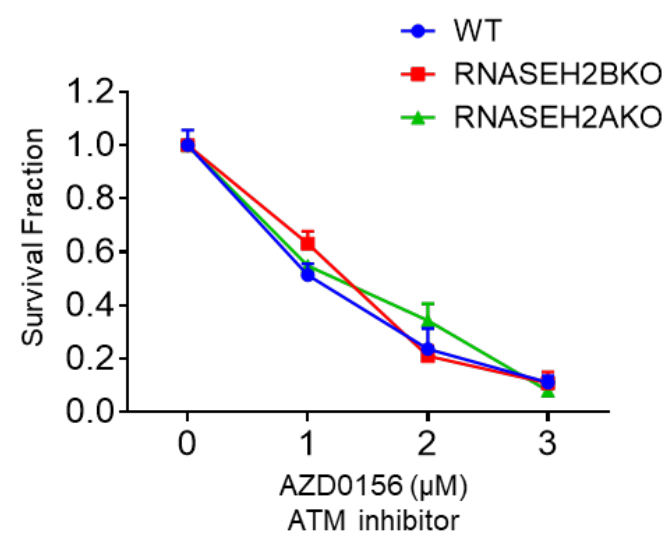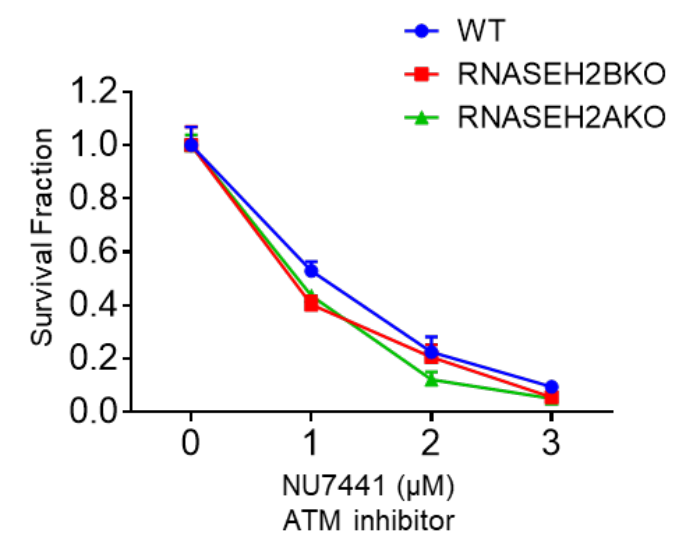

Supplement: NIHMS1512893-supplement-Supplementary_Figure_4.pdf [file NIHMS1512893-supplement-Supplementary_Figure_4.pdf]

A

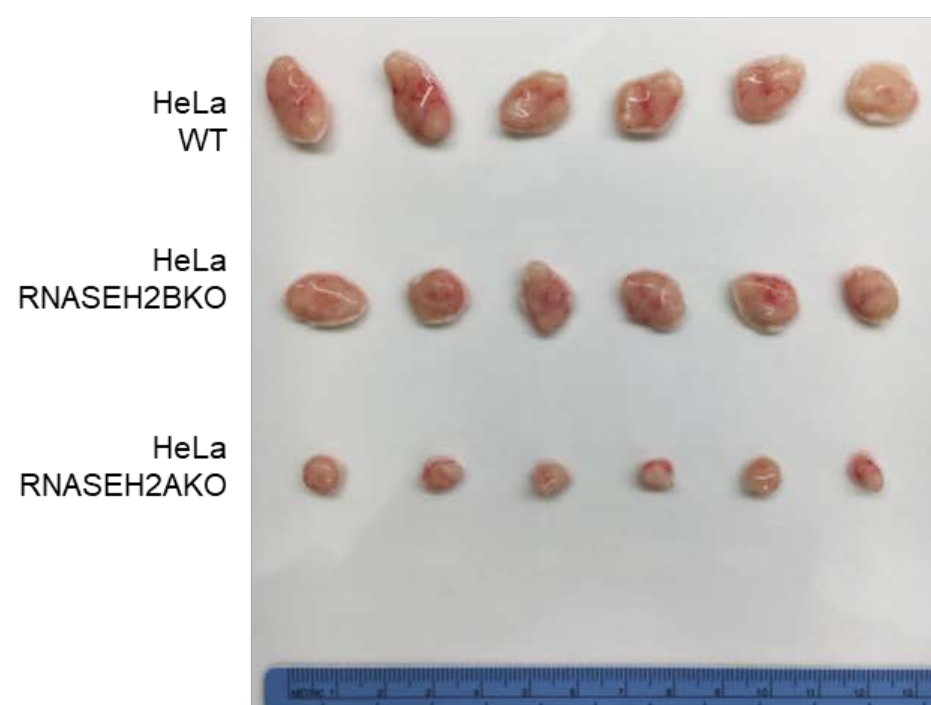

B

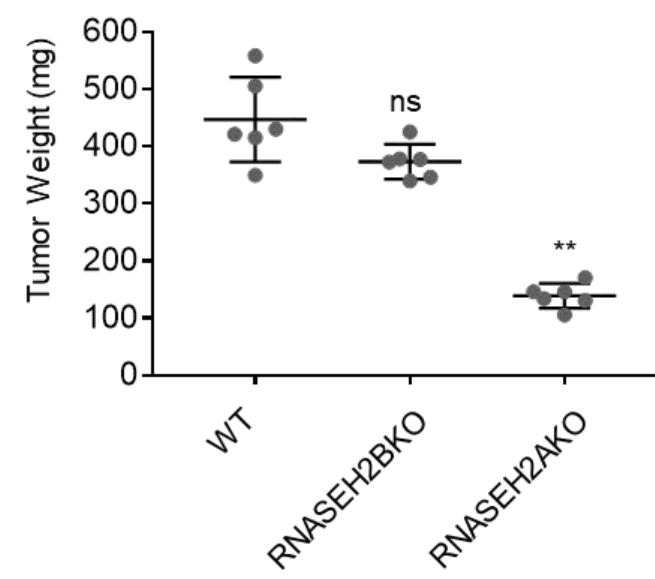

Supplement: NIHMS1512893-supplement-Supplementary_Figure_5.pdf [file NIHMS1512893-supplement-Supplementary_Figure_5.pdf]

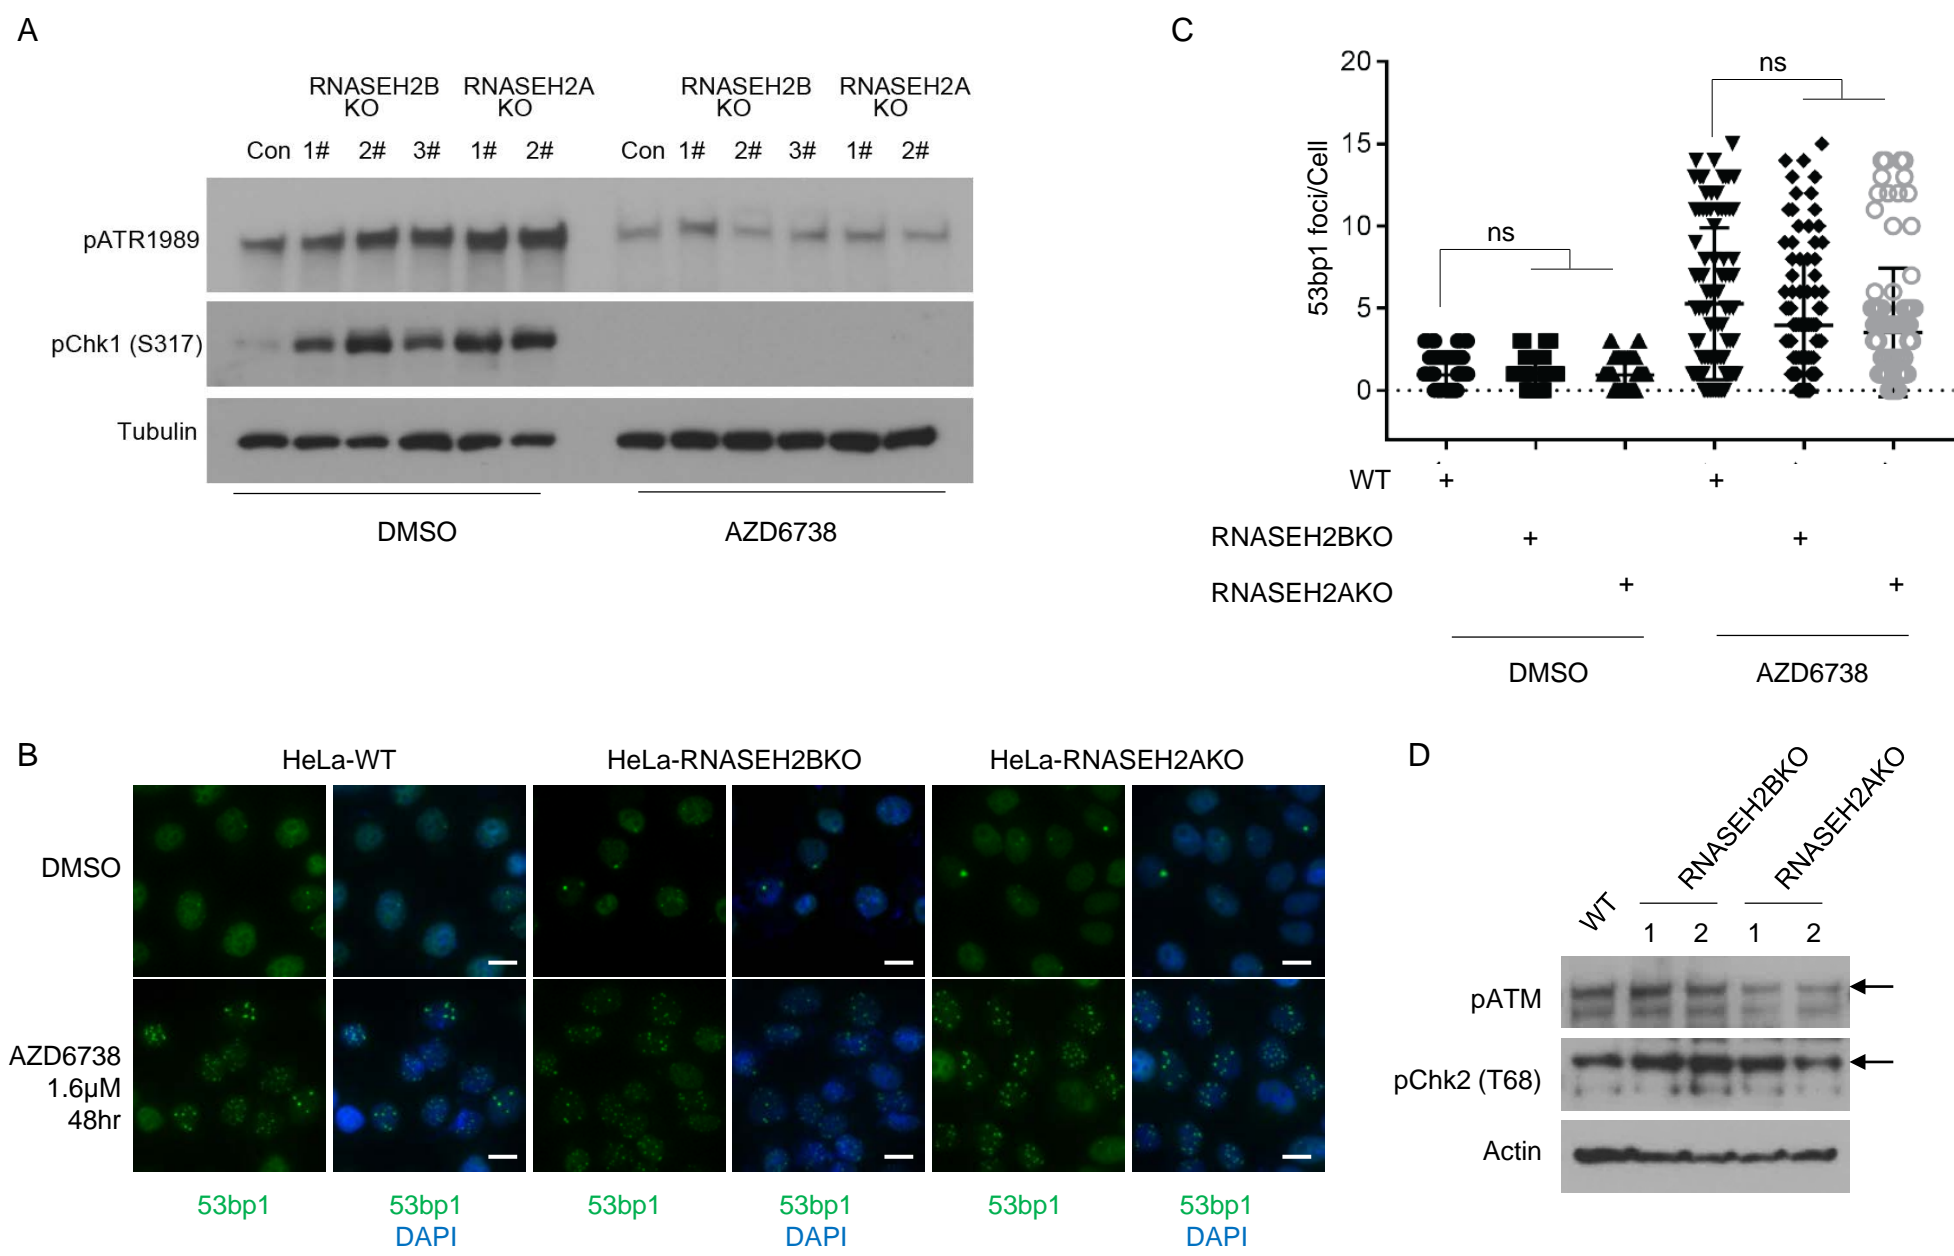

Supplement: NIHMS1512893-supplement-Supplementary_Figure_6.pdf [file NIHMS1512893-supplement-Supplementary_Figure_6.pdf]

Supplementary Figure 7 (related to Figure 3)

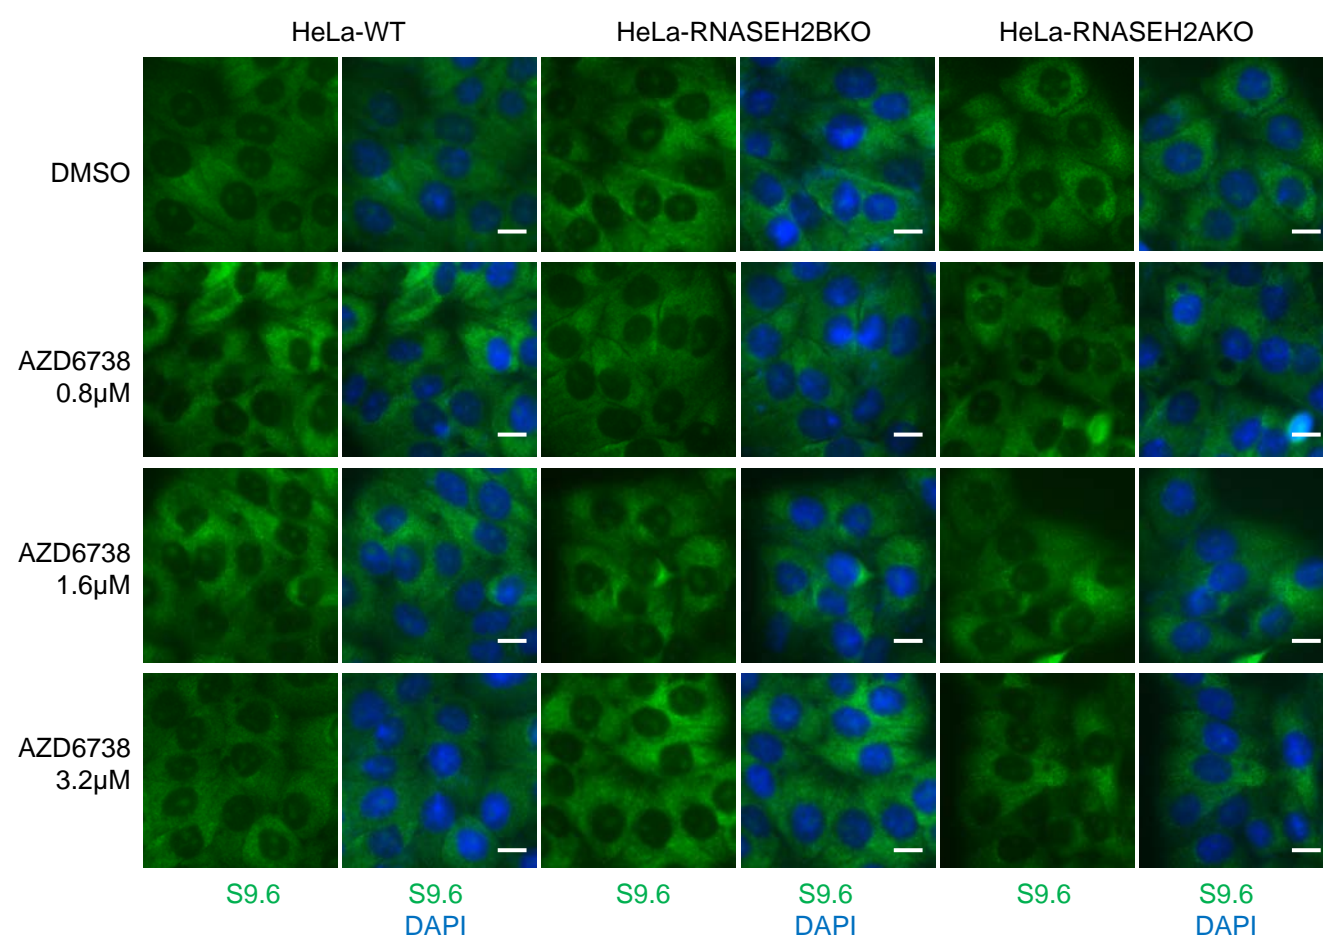

Supplement: NIHMS1512893-supplement-Supplementary_Figure_7.pdf [file NIHMS1512893-supplement-Supplementary_Figure_7.pdf]

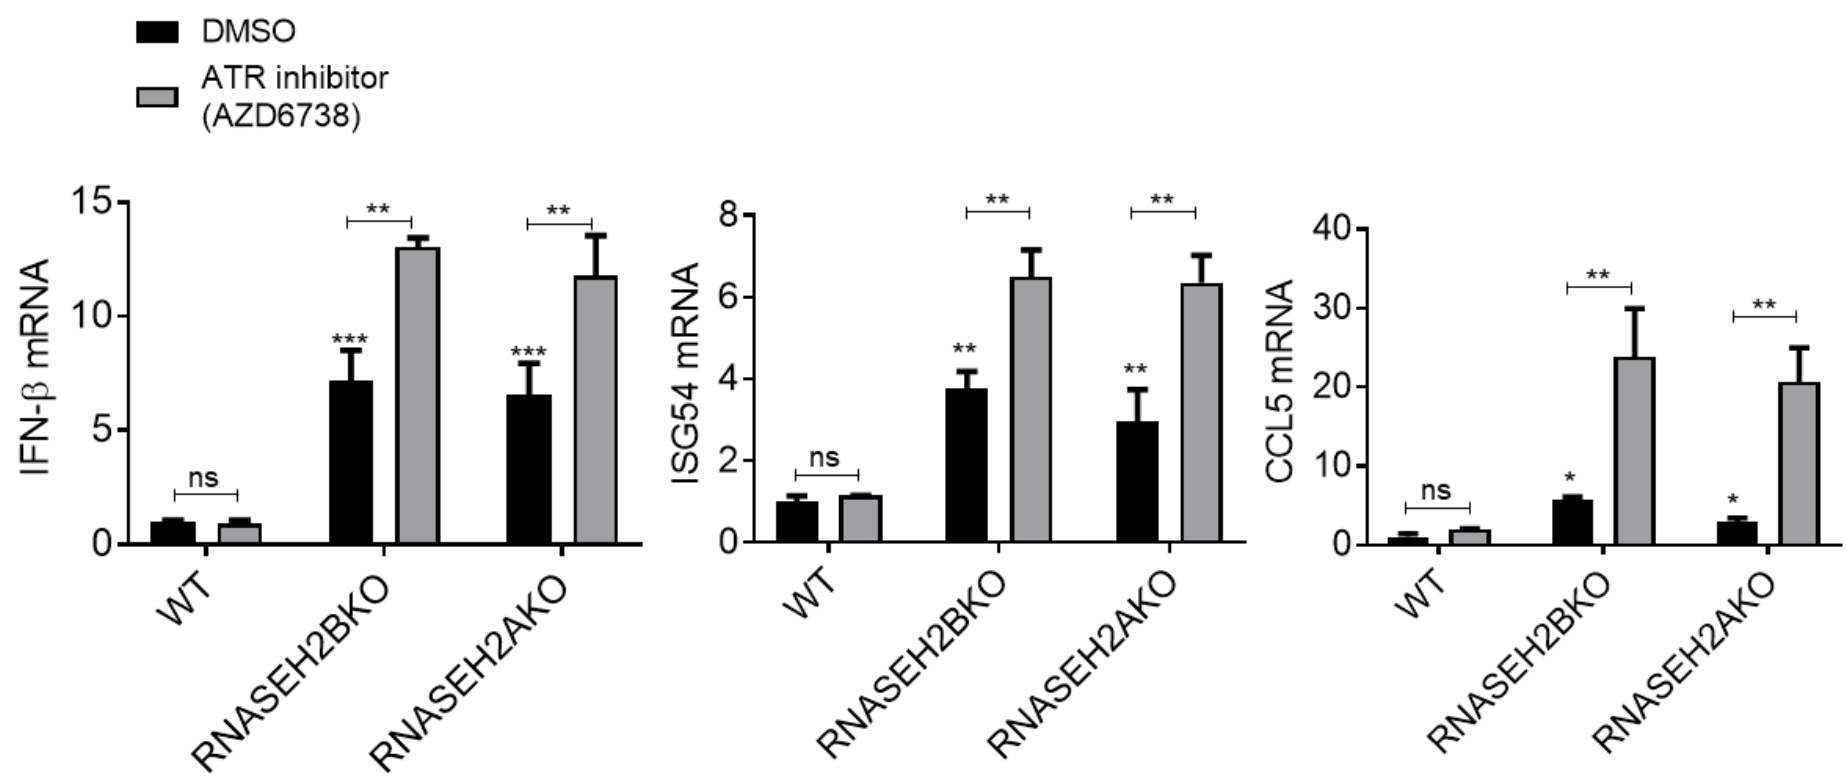

Supplement: NIHMS1512893-supplement-Supplementary_Figure_8.pdf [file NIHMS1512893-supplement-Supplementary_Figure_8.pdf]

A

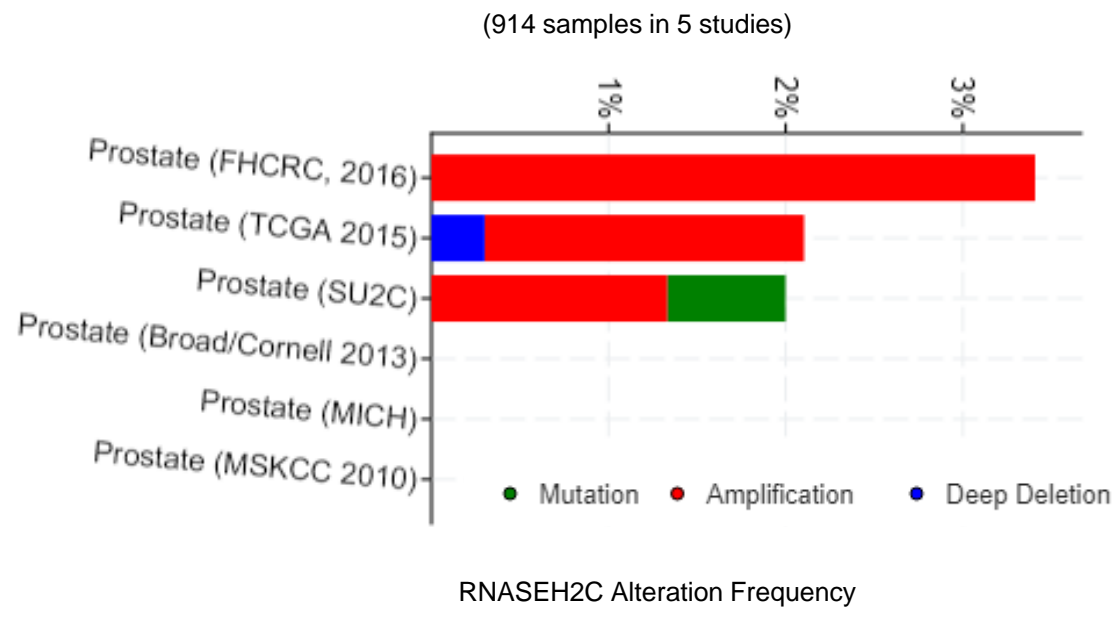

B

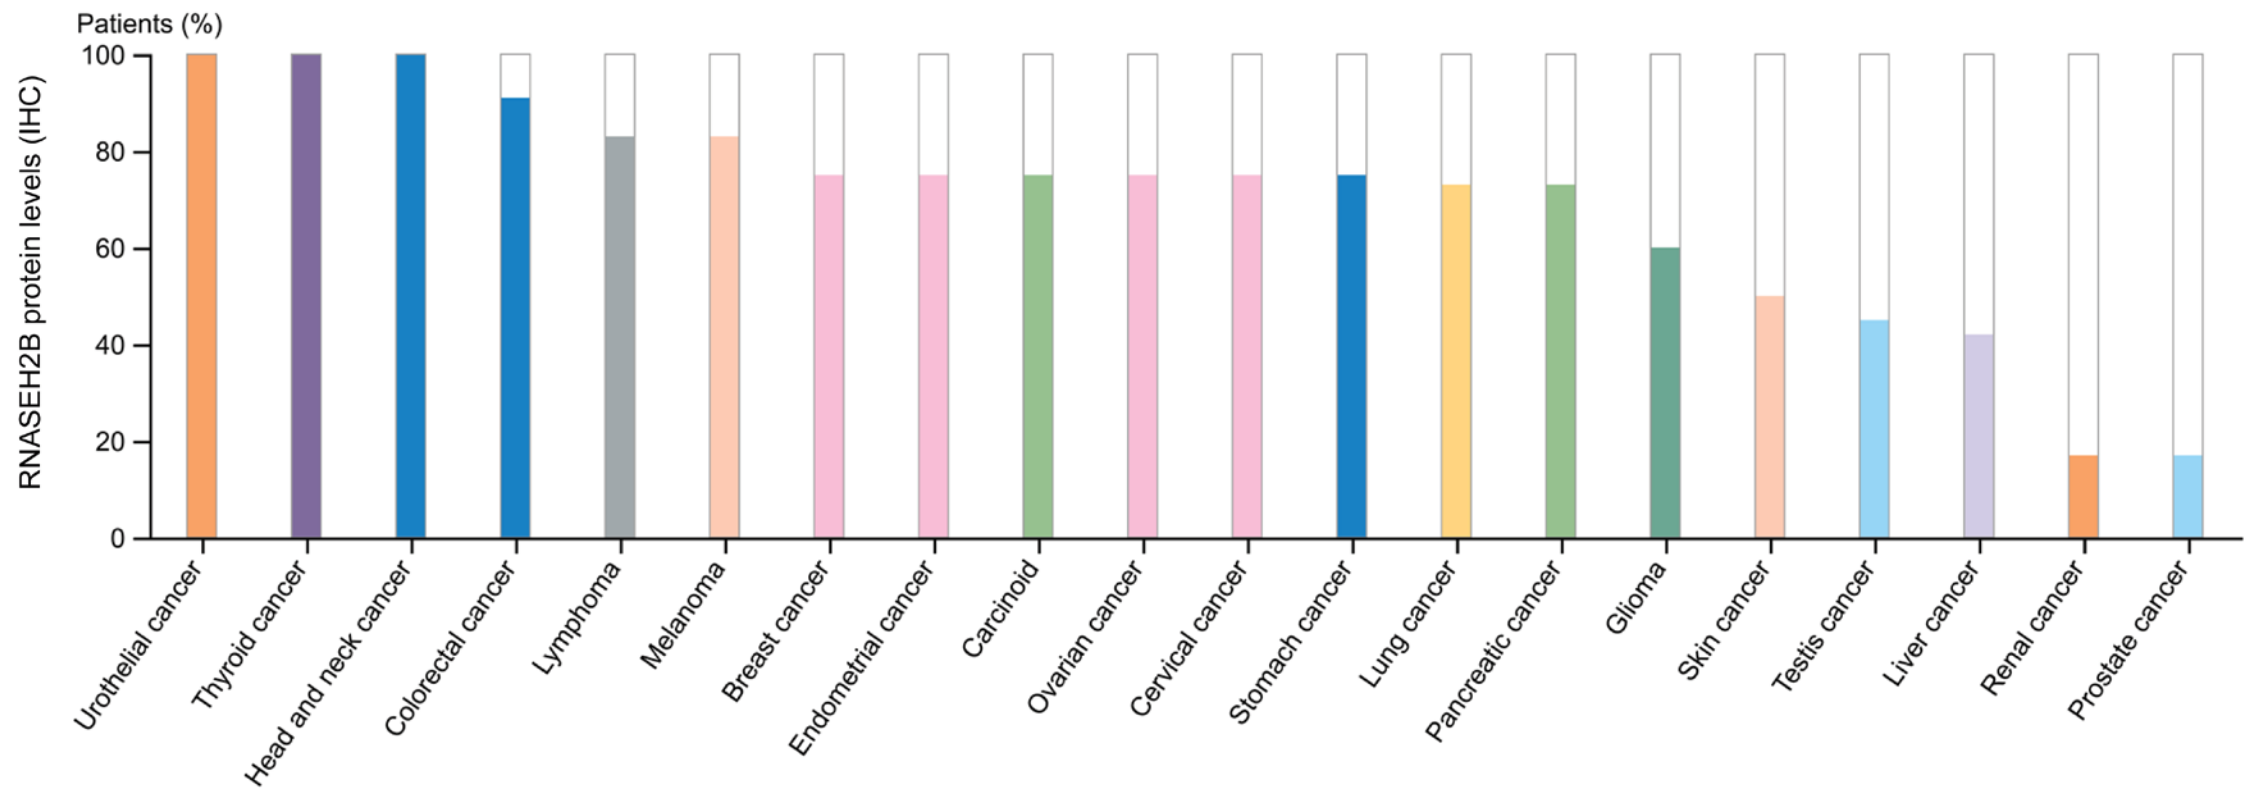

\* Colors represent samples with RNASEH2B signals.

Supplement: NIHMS1512893-supplement-Supplementary_Figure_9.pdf [file NIHMS1512893-supplement-Supplementary_Figure_9.pdf]
